# Supplementary material for: The Impact of the COVID-19 Pandemic on Young Adults’ Mental Health in Switzerland: A Longitudinal Cohort Study from 2018 to 2021
Source: MDPI journal article supplement (doi:10.3390/ijerph20032598), 2023-01-31
Supplement: s1 [file s1]

## Supplementary material

**Table S1:** Odds ratios obtained from a logistic regression model predicting drop-out status (participating in all three wave vs. only in the first wave) by 2018 study variables.

| Drop-out predictor 2018                                   | Odds ratio | 95% CI |      | p-value |
|-----------------------------------------------------------|------------|--------|------|---------|
| Depression 2018 (ref: no)                                 | 0.82       | 0.64   | 1.05 | 0.1232  |
| GAD 2018 (ref: no)                                        | 0.83       | 0.64   | 1.08 | 0.1775  |
| Thoughts death self-harm 2018 (ref: no)                   | 1.04       | 0.82   | 1.33 | 0.7307  |
| ADHD 2018 (ref: no)                                       | 1.01       | 0.76   | 1.32 | 0.9710  |
| RSOD 2018 (ref: less than monthly)                        |            |        |      |         |
| Monthly                                                   | 0.85       | 0.72   | 1.00 | 0.0549  |
| Weekly                                                    | 0.69       | 0.54   | 0.88 | 0.0035  |
| Young women 2018 (ref: young men)                         | 1.31       | 1.13   | 1.52 | 0.0003  |
| Age 2018                                                  | 1.01       | 0.96   | 1.06 | 0.7647  |
| Non-Swiss citizen status 2018 (ref: Swiss citizen status) | 0.50       | 0.41   | 0.60 | 0.0000  |
| Household income 2018 (ref: < 6000.- CHF)                 |            |        |      |         |
| about 6'000.- CHF                                         | 1.11       | 0.86   | 1.43 | 0.4231  |
| > 6'000.- CHF                                             | 1.36       | 1.13   | 1.63 | 0.0013  |
| Don't know                                                | 1.20       | 0.97   | 1.49 | 0.0967  |
| Don't want to specify                                     | 0.90       | 0.69   | 1.17 | 0.4353  |
| Ability to pay one's bills 2018 (ref: yes)                |            |        |      |         |
| No                                                        | 0.65       | 0.52   | 0.81 | 0.0002  |
| Don't know                                                | 0.86       | 0.66   | 1.11 | 0.2568  |
| Language region 2018 (ref: German-speaking)               |            |        |      |         |
| French-speaking                                           | 0.99       | 0.84   | 1.17 | 0.9446  |
| Italian-speaking                                          | 1.47       | 1.08   | 1.98 | 0.0129  |

ref = reference category. CI = Confidence interval. GAD = Generalized anxiety disorder. ADHD = Attention-deficit/Hyperactivity Disorder. RSOD = Risky single-occasion drinking.
